# Supplementary material for: Life Course Nature Exposure and Mental Health Outcomes: A Systematic Review and Future Directions
Source: MDPI journal article supplement (doi:10.3390/ijerph18105146), 2021-05-12
Supplement: s1 [file s1]

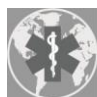

## Supplementary Material I.

Search Syntax for Web of Science

TS = ((green-space\* or green-and-blue-space\* or green-or-blue-space\* or greenspace\* or green-place\* or greenery or greenness or "nearby nature" or "access to nature" or "exposure to nature" or "urban nature" or "connectedness to nature" or "connection to nature" or natural-environment\* or natural-setting\* or park or parks or tree-canop\* or "tree cover" or garden\* or urban-forest\* or vegetation or "outdoor recreation" or "outdoor play" or ecotouris\* or wilderness)

AND

(life-course or life-stage\* or life-trajector\* or childhood or adolescence or adulthood or life-path\* or life-transition\* or life-chang\* or lifelong or life-long or grow-up or growing-up or grown-up\* or grownup\* or early-life or later-life or later-in-life or life-experience\* or turning-point\* or reminiscen\*))

Supplementary Material II.

Table S1. Study Quality Assessment Results.

|   | Study                    | Assessment Item* |   |       |   |   |   |   |   |   |    |    |       |       |    | Total | Quality rating |
|---|--------------------------|------------------|---|-------|---|---|---|---|---|---|----|----|-------|-------|----|-------|----------------|
|   |                          | 1                | 2 | 3     | 4 | 5 | 6 | 7 | 8 | 9 | 10 | 11 | 12    | 13    | 14 |       |                |
| 1 | Astell-Burt et al., 2014 | Y                | Y | NA/NR | Y | N | N | Y | Y | Y | N  | Y  | NA/NR | NA/NR | Y  | 8     | Fair           |
| 2 | Bezold et al., 2018      | Y                | Y | NA/NR | Y | N | Y | Y | Y | Y | Y  | Y  | NA/NR | NA/NR | Y  | 10    | Good           |
| 3 | Cherrie et al., 2018     | Y                | Y | NA/NR | Y | N | Y | Y | Y | Y | Y  | Y  | NA/NR | Y     | Y  | 11    | Good           |
| 4 | Cherrie et al., 2019     | Y                | Y | NA/NR | Y | N | Y | Y | Y | Y | Y  | Y  | NA/NR | NA/NR | Y  | 10    | Good           |
| 5 | Clarke et al., 2015      | Y                | Y | Y     | Y | N | N | Y | Y | Y | N  | Y  | NA/NR | Y     | Y  | 10    | Good           |
| 6 | Dad-vand et al., 2017    | Y                | Y | NA/NR | Y | N | Y | Y | Y | Y | Y  | Y  | NA/NR | N     | Y  | 10    | Good           |
| 7 | Dad-vand et al., 2018    | Y                | Y | NA/NR | Y | N | Y | Y | Y | Y | N  | Y  | NA/NR | NA/NR | Y  | 9     | Good           |

|    |                                   |   |   |       |   |   |   |   |   |   |   |   |       |       |   |    |      |
|----|-----------------------------------|---|---|-------|---|---|---|---|---|---|---|---|-------|-------|---|----|------|
| 8  | Do-<br>novan<br>et al.,<br>2019   | Y | Y | NA/NR | Y | N | Y | Y | Y | Y | Y | Y | NA/NR | Y     | Y | 11 | Good |
| 9  | Enge-<br>mann et<br>al., 2018     | Y | Y | NA/NR | Y | N | Y | Y | Y | Y | Y | Y | NA/NR | Y     | Y | 11 | Good |
| 10 | Enge-<br>mann et<br>al.,<br>2019b | Y | Y | NA/NR | Y | N | Y | Y | Y | Y | Y | Y | NA/NR | Y     | Y | 11 | Good |
| 11 | Enge-<br>mann et<br>al.,<br>2019a | Y | Y | Y     | Y | N | Y | Y | Y | Y | Y | Y | NA/NR | Y     | Y | 12 | Good |
| 12 | Enge-<br>mann et<br>al., 2020     | Y | Y | Y     | Y | N | Y | Y | Y | Y | Y | Y | NA/NR | NA/NR | Y | 11 | Good |
| 13 | Feng et<br>al., 2017              | Y | Y | Y     | Y | N | N | Y | Y | Y | N | Y | NA/NR | N     | Y | 9  | Good |
| 14 | Flouri et<br>al., 2014            | Y | Y | NA/NR | Y | N | Y | Y | Y | Y | N | Y | NA/NR | NA/NR | Y | 9  | Good |
| 15 | Janke et<br>al., 2008             | Y | Y | NA/NR | Y | N | Y | Y | Y | Y | Y | Y | NA/NR | NA/NR | Y | 10 | Good |
| 16 | Ku et<br>al., 2016                | Y | Y | NA/NR | Y | N | Y | Y | Y | Y | Y | Y | NA/NR | Y     | Y | 11 | Good |
| 17 | Liao et<br>al., 2019              | Y | Y | Y     | Y | N | Y | Y | Y | Y | N | Y | NA/NR | Y     | Y | 11 | Good |

|    |                       |   |   |       |   |   |   |   |   |   |   |   |       |       |   |    |      |
|----|-----------------------|---|---|-------|---|---|---|---|---|---|---|---|-------|-------|---|----|------|
| 18 | Markey et al., 2018   | Y | Y | NA/NR | Y | N | Y | Y | Y | Y | Y | Y | NA/NR | NA/NR | Y | 10 | Good |
| 19 | McCallum et al., 2007 | Y | Y | Y     | Y | N | Y | Y | N | Y | N | Y | NA/NR | NA/NR | Y | 9  | Good |
| 20 | Pearce et al., 2018   | Y | Y | NA/NR | Y | N | Y | Y | Y | Y | Y | Y | NA/NR | NA/NR | Y | 10 | Good |
| 21 | Pensini et al., 2016  | Y | Y | NA/NR | N | N | N | Y | Y | Y | N | Y | NA/NR | NA/NR | N | 6  | Fair |
| 22 | Preuß et al., 2019    | Y | Y | NA/NR | Y | N | N | Y | Y | Y | N | Y | NA/NR | NA/NR | Y | 8  | Fair |
| 23 | Reuben et al., 2019   | Y | Y | Y     | Y | N | Y | Y | Y | Y | Y | Y | NA/NR | Y     | Y | 12 | Good |
| 24 | Snell et al., 2016    | Y | Y | NA/NR | N | N | N | Y | Y | Y | N | Y | NA/NR | NA/NR | N | 6  | Fair |
| 25 | Ulset et al., 2017    | Y | Y | Y     | Y | N | N | Y | Y | Y | N | Y | NA/NR | Y     | Y | 10 | Good |
| 26 | Van Aart et al., 2018 | Y | Y | NA/NR | Y | N | Y | Y | Y | Y | N | Y | NA/NR | Y     | Y | 10 | Good |

|    |                           |   |   |       |   |   |   |   |   |   |   |   |       |       |   |    |      |
|----|---------------------------|---|---|-------|---|---|---|---|---|---|---|---|-------|-------|---|----|------|
| 27 | Van den Berg et al., 2016 | Y | Y | N     | Y | N | N | Y | N | Y | N | Y | NA/NR | NA/NR | Y | 7  | Fair |
| 28 | Wood et al., 2020         | Y | Y | NA/NR | Y | N | N | Y | Y | Y | N | Y | NA/NR | NA/NR | N | 7  | Fair |
| 29 | Younan et al., 2016       | Y | Y | NA/NR | Y | N | Y | Y | Y | Y | Y | Y | NA/NR | Y     | Y | 11 | Good |

\* Assessment Items from the Quality Assessment Tool for Observational Cohort and Cross-Sectional Studies by the National Heart, Lung, and Blood Institute.

1. Was the research question or objective in this paper clearly stated?
2. Was the study population clearly specified and defined?
3. Was the participation rate of eligible persons at least 50%?
4. Were all the subjects selected or recruited from the same or similar populations? Were inclusion and exclusion criteria for being in the study prespecified and applied uniformly to all participants?
5. Was a sample size justification, power description, or variance and effect estimates provided?
6. For the analyses in this paper, were the exposure(s) of interest measured prior to the outcome(s) being measured?
7. Was the timeframe sufficient so that one could reasonably expect to see an association between exposure and outcome if it existed?
8. For exposures that can vary in amount or level, did the study examine different levels of the exposure as related to the outcome?
9. Were the exposure measures (independent variables) clearly defined, valid, reliable, and implemented consistently across all study participants?
10. Was the exposure(s) assessed more than once over time?
11. Were the outcome measures (dependent variables) clearly defined, valid, reliable, and implemented consistently across all study participants?
12. Were the outcome assessors blinded to the exposure status of participants?
13. Was loss to follow-up after baseline 20% or less?
14. Were key potential confounding variables measured and adjusted statistically for their impact on the relationship between exposure(s) and outcome(s)?

### Supplementary Material III.

**Table S2.** Qualitative Studies Identified and Reviewed.

|       | Author-year                            | Country       | Population                                                                      | Sample size | Methods                                                                                                   |
|-------|----------------------------------------|---------------|---------------------------------------------------------------------------------|-------------|-----------------------------------------------------------------------------------------------------------|
| 1 & 2 | Bell et al., 2015<br>Bell et al., 2017 | UK            | Adults (25–85 yr) reside<br>in coastal towns                                    | 33          | Activity maps, GPS tracking, geo-narrative interviews, go-along interviews                                |
| 3     | Diduck et al., 2020                    | Canada        | Adults (in some cases<br>couples/family) residents<br>engaged in home gardening | 42          | Semi-structured interviews                                                                                |
| 4     | Husser et al., 2020                    | US            | Older women (71–91 yr)<br>in rural areas                                        | 34          | In-depth interviews (four<br>times during a five-year<br>period)                                          |
| 5     | Lloyd et al., 2008                     | Australia     | Teenage girls (14–18 yr)                                                        | 11          | Semi-structured interviews                                                                                |
| 6     | MacIntyre et al., 2019                 | Multi-country | Extreme sport athletes                                                          | 8           | Semi-structured interviews                                                                                |
| 7     | Milligan & Bingley, 2007               | US            | Young adults (16–21 yr)                                                         | 16          | Focus group, workshop<br>sessions (e.g., walk, craft<br>session, sand play, modeling), in-depth interview |
| 8     | Pace & Walker, 2020                    | Canada        | Older adults (50+ yr)<br>Southern Inuit of Nunatu<br>Kavut                      | 14          | Photovoice                                                                                                |

---

|   |                      |        |                   |    |            |
|---|----------------------|--------|-------------------|----|------------|
| 9 | Weimann et al., 2019 | Sweden | Adults (18–70 yr) | 16 | Interviews |
|---|----------------------|--------|-------------------|----|------------|

---
